# Supplementary material for: What has changed in 20 years? Structure and function of soft-sediment macrofauna in a subarctic embayment, Newfoundland (Canada)
Source: bioRxiv or medRxiv preprint supplement (doi:10.1101/2023.10.29.564610), 2023-11-01
Supplement: Supplementary file [file media-1.pdf]

## Supplementary Material

**Table S1.** Functional traits and modalities with corresponding abbreviations and associated ecosystem function. Definitions based on those provided by the Arctic Trait Base (Degen and Faulwetter 2019).

| <b>Trait</b>       | <b>Modality</b>         | <b>Definition</b>                                                    | <b>Abbreviation</b> | <b>Function</b>                                                                 |
|--------------------|-------------------------|----------------------------------------------------------------------|---------------------|---------------------------------------------------------------------------------|
| Adult Movement     | Sessile                 | No movement                                                          | Sessile             | Foraging ability, predatory avoidance, dispersal abilities                      |
|                    | Burrower                | Burrows in sediments                                                 | Bur                 |                                                                                 |
|                    | Crawler                 | Move along sediment via legs or other appendages                     | Crawl               |                                                                                 |
|                    | Swimmer                 | Moves above the sediment                                             | Swim                |                                                                                 |
| Body Size          | Small                   | <10 mm                                                               | Sm                  | Energetic demand, ability to resistance predation                               |
|                    | Small-medium            | 10—50 mm                                                             | Sm-Med              |                                                                                 |
|                    | Medium                  | 50—100 mm                                                            | Med                 |                                                                                 |
|                    | Medium-large            | 100—300 mm                                                           | Med-Lg              |                                                                                 |
|                    | Large                   | >300 mm                                                              | Lg                  |                                                                                 |
| Larval Development | Pelagic/Planktrophic    | Larvae grow in the water column                                      | Plank               | Fecundity, development, and dispersion insights                                 |
|                    | Pelagic/lecithotrophic  | Larvae with yolk sac, pelagic period is short                        | Lecith              |                                                                                 |
|                    | Benthic/direct          | Larvae have benthic development                                      | Direct              |                                                                                 |
| Reproduction       | Asexual                 | Budding & fission                                                    | Asex                | Dispersal, continuous reproduction could allow for resilience, production       |
|                    | Sexual: external        | External fertilization (e.g., eggs & sperm released into water)      | SexEx               |                                                                                 |
|                    | Sexual: internal        | Internal fertilization                                               | SexIn               |                                                                                 |
|                    | Sexual: brooding        | Internal or external fertilization but eggs are brooded              | SexBrod             |                                                                                 |
| Bioturbation       | Diffusive mixing        | Random mixing of particles                                           | Diffus              | Impacts on biogeochemical cycles, food acquisition, resistance from disturbance |
|                    | Surface deposit         | Deposition of particles at sediment surface (e.g., from defecation)  | SurfD               |                                                                                 |
|                    | Conveyer belt (upward)  | Movement of sediment/particles from within sediment to the surface   | CVbeltup            |                                                                                 |
|                    | Conveyer belt (reverse) | Movement of sediment/particles from surface to deep within sediments | CVbeltrev           |                                                                                 |
|                    | None                    | No bioturbation                                                      | Nobio               |                                                                                 |
| Feeding Mode       | Subsurface deposit      | Feeds within the sediment                                            | SubD                | Method of resource acquisition, living position, growth requirements            |
|                    | Suspension              | Feeds on particles suspended in the water                            | Suspen              |                                                                                 |

|                |                  |                                                                                                                  |          |                                                                                                                                                                  |
|----------------|------------------|------------------------------------------------------------------------------------------------------------------|----------|------------------------------------------------------------------------------------------------------------------------------------------------------------------|
|                | Surface deposit  | Feeds on material from sediment surface                                                                          | SurfD    |                                                                                                                                                                  |
|                | Scavenger        | Feeds on a variety of particles                                                                                  | Scav     |                                                                                                                                                                  |
|                | Predator         | Feeds on other organisms                                                                                         | Pred     |                                                                                                                                                                  |
|                | Parasite         | Uses host to obtain food                                                                                         | Para     |                                                                                                                                                                  |
| Living Habitat | Free living      | Freely move within/on sediments                                                                                  | Free     | Position in sediment, food acquisition, preferred environmental conditions                                                                                       |
|                | Crevice dwelling | Tend to live in spaces between rocks                                                                             | Crevice  |                                                                                                                                                                  |
|                | Tube dwelling    | Create tubes                                                                                                     | Tube     |                                                                                                                                                                  |
|                | Burrowing        | Burrow within sediments                                                                                          | Bur      |                                                                                                                                                                  |
|                | Epi/endo/phytic  | Live on/in other organisms                                                                                       | Epi/Endo |                                                                                                                                                                  |
|                | Attached         | Live attached to substrate                                                                                       | Attach   |                                                                                                                                                                  |
| Tolerance      | Low              | Species sensitive to changes in environment (e.g., organic enrichment, pollution, temperature, salinity changes) | Low      | Species/taxa tolerance to disturbance (e.g., temperature, salinity, organic enrichment). Low indicating very sensitive and high indicated tolerant to conditions |
|                | Medium           | Species indifferent                                                                                              | Med      |                                                                                                                                                                  |
|                | High             | Species tolerant                                                                                                 | High     |                                                                                                                                                                  |

**Table S2.** Density (no. ind. 0.1m<sup>-2</sup> ±SE) of species/taxa for major taxonomic groups (i.e., Amphipoda, Bivalvia, Gastropoda, Polychaeta, other) in historical versus contemporary samples.

| Major Group                | Species/Taxa                         | Historical Density<br>(no. ind.m <sup>-2</sup> ±SE) | Contemporary Density<br>(no. ind.m <sup>-2</sup> ±SE) |
|----------------------------|--------------------------------------|-----------------------------------------------------|-------------------------------------------------------|
| <b>Amphipoda</b>           | <i>Aceroides (Aceroides) latipes</i> | 0.12±0.09                                           | 0.30±0.14                                             |
|                            | <i>Bathymedon</i> sp.                | 1.40±0.46                                           | 0.00±0.00                                             |
|                            | <i>Byblis gaimardii</i>              | 0.67±0.40                                           | 0.09±0.07                                             |
|                            | <i>Hippomedon</i> sp.                | 1.95±1.04                                           | 0.09±0.07                                             |
|                            | <i>Megamoera dentata</i>             | 0.00±0.00                                           | 0.27±0.19                                             |
|                            | <i>Melita</i> sp.                    | 0.43±0.30                                           | 0.00±0.00                                             |
|                            | <i>Monocluades</i> sp.               | 0.12±0.085                                          | 0.51±0.31                                             |
|                            | <i>Orchomenella minuta</i>           | 0.00±0.00                                           | 0.75±0.23                                             |
|                            | <i>Paratryphosites abyssi</i>        | 0.00±0.00                                           | 5.59±3.19                                             |
|                            | <i>Pontoporeia femorata</i>          | 1.16±0.50                                           | 1.56±0.38                                             |
|                            | <i>Protomedeia</i> sp.               | 0.73±0.73                                           | 0.00±0.00                                             |
| <i>Quasimelita formosa</i> | 0.31±0.22                            | 0.00±0.00                                           |                                                       |
| <b>Bivalvia</b>            | <i>Axinopsida orbiculata</i>         | 0.00±0.00                                           | 1.97±1.18                                             |
|                            | <i>Ennucula</i> sp.                  | 1.59±0.44                                           | 0.99±0.24                                             |
|                            | <i>Macoma calcarea</i>               | 12.13±2.37                                          | 14.11±2.78                                            |
|                            | <i>Megayoldia thraciaeformis</i>     | 0.00±0.00                                           | 1.63±0.34                                             |
|                            | <i>Nuculana pernula</i>              | 5.18±0.75                                           | 9.54±1.81                                             |
|                            | <i>Thyasira</i> sp.                  | 11.10±2.15                                          | 13.25 ± 2.71                                          |
|                            | <i>Yoldia hyperborea</i>             | 0.37±0.16                                           | 1.50±0.31                                             |
|                            | <i>Yoldia</i> sp.                    | 2.44±0.60                                           | 0.00±0.00                                             |
| <b>Gastropoda</b>          | <i>Curtitoma incisula</i>            | 0.00±0.00                                           | 1.08±0.30                                             |
|                            | <i>Propebla rugulata</i>             | 0.00±0.00                                           | 1.56±0.38                                             |
|                            | <i>Retusa obtusa</i>                 | 2.38±0.60                                           | 0.63±0.40                                             |
|                            | <i>Tachyrhynchus erosus</i>          | 0.00±0.00                                           | 1.23±0.46                                             |

|                   |                                 |              |            |
|-------------------|---------------------------------|--------------|------------|
|                   | <i>Turridae</i> sp.             | 1.10±0.34    | 0.00±0.00  |
| <b>Polychaeta</b> | Ampharetidae sp. A              | 0.92±0.63    | 0.00±0.00  |
|                   | <i>Ampharete finmarchia</i>     | 0.24±0.15    | 0.00±0.00  |
|                   | <i>Apistocranchus typicus</i>   | 0.79±0.32    | 0.63±0.37  |
|                   | <i>Arcteobia anticostiensis</i> | 0.06±0.06    | 0.54±0.18  |
|                   | Aricidae sp.                    | 7.80±1.53    | 1.32±0.39  |
|                   | <i>Artacama proboscidae</i>     | 1.77±0.84    | 0.00±0.00  |
|                   | <i>Bradabyssa villosa</i>       | 1.28±0.75    | 0.60±0.27  |
|                   | Capitellidae spp.               | 12.87±2.95   | 2.09±0.50  |
|                   | <i>Chaetozone</i> sp.           | 13.29±1.99   | 5.39±1.27  |
|                   | <i>Cistenides hyperborea</i>    | 15.92±9.15   | 0.27±0.12  |
|                   | <i>Cossura pygodactylata</i>    | 465.73±64.87 | 28.56±6.88 |
|                   | <i>Dipolydora caulleryi</i>     | 0.49±0.49    | 0.00±0.00  |
|                   | Dorvilleidae spp.               | 30.12±6.07   | 1.82±1.46  |
|                   | <i>Dipolydora socialis</i>      | 0.00±0.00    | 0.33±0.14  |
|                   | <i>Dysponetus pygmaeus</i>      | 0.73±0.22    | 0.00±0.00  |
|                   | <i>Enipo canadensis</i>         | 0.18±0.13    | 0.42±0.20  |
|                   | <i>Eteone flava</i>             | 0.00±0.00    | 1.02±0.34  |
|                   | <i>Eteone longa</i>             | 2.99±0.58    | 0.66±0.20  |
|                   | <i>Euchone incolor</i>          | 3.29±1.71    | 0.72±0.40  |
|                   | <i>Goniada maculata</i>         | 0.24±0.15    | 0.33±0.10  |
|                   | <i>Gyptis bruneli</i>           | 16.40±1.66   | 2.24±0.73  |
|                   | Lumbrineridae spp.              | 19.82±4.93   | 16.86±2.46 |
|                   | <i>Lysilla loveni</i>           | 1.65±0.43    | 0.12±0.07  |
|                   | <i>Maldane glebifex</i>         | 1.52±0.94    | 0.00±0.00  |
|                   | <i>Maldane sarsi</i>            | 0.00±0.00    | 1.89±0.81  |
|                   | <i>Maldane</i> sp. A            | 0.30±0.20    | 0.00±0.00  |
|                   | <i>Microneptyys neotana</i>     | 18.41±1.93   | 6.04±0.81  |

|       |                                 |            |            |
|-------|---------------------------------|------------|------------|
|       | <i>Nephtys ciliata</i>          | 0.31±0.13  | 1.50±0.29  |
|       | <i>Nereimyra aphroditoides</i>  | 8.96±7.04  | 0.36±0.16  |
|       | <i>Paradoneis lyra</i>          | 0.00±0.00  | 0.99±0.45  |
|       | Paraonidae sp. A                | 0.55±0.38  | 0.00±0.00  |
|       | <i>Pherusa plumosa</i>          | 0.49±0.24  | 0.15±0.08  |
|       | <i>Pholoe longa</i>             | 0.55±0.31  | 3.07±1.52  |
|       | <i>Pholoe minuta</i>            | 0.96±0.10  | 0.96±0.41  |
|       | <i>Prionospio steenstrupi</i>   | 41.46±8.52 | 17.50±3.11 |
|       | <i>Scalibregma inflatum</i>     | 0.37±0.19  | 0.03±0.03  |
|       | <i>Scoloplos armiger</i>        | 1.77±0.99  | 2.22±0.71  |
|       | <i>Sphaerodoridium minutum</i>  | 1.65±0.63  | 0.18±0.08  |
|       | <i>Spiochaetopterus typicus</i> | 0.12±0.09  | 0.42±0.15  |
|       | <i>Syllides</i> sp.             | 2.20±0.85  | 0.00±0.00  |
|       | <i>Terebellides stroemii</i>    | 3.35±0.68  | 0.57±0.16  |
|       | <i>Terebellidae</i> sp. B       | 0.85±0.40  | 0.00±0.00  |
| Other | <i>Antalis entalis</i>          | 2.99±0.87  | 6.15±1.53  |
|       | Chaetognatha                    | 0.12±0.09  | 0.18±0.07  |
|       | <i>Ctenodiscus crispatus</i>    | 0.18±0.10  | 0.45±0.13  |
|       | Cumacean spp.                   | 5.24±1.45  | 3.01±0.80  |
|       | Echinoidea                      | 0.55±0.21  | 0.06±0.04  |
|       | Nemertea spp.                   | 10.49±1.76 | 4.80±1.25  |
|       | Ophiuridae                      | 2.74±0.60  | 1.27±0.40  |
|       | <i>Priapulus caudatus</i>       | 0.00±0.00  | 0.30±0.17  |
|       | Sipunculidea sp.                | 2.44±0.56  | 0.48±0.15  |
|       | Tanaidacea                      | 0.31±0.20  | 0.03±0.03  |

Note: to take a conservative approach, the following were grouped when considering “unique” species/taxa to historical and contemporary communities 1. *Maldane sarsi* and *Maldane* sp. A grouped as “*Maldane* sp.” And 2. *Paradoneis lyra* and Paraonidae sp. A grouped as “Paraonidae sp.”

**Table S3.** Abundance (total no. individuals) of species/taxa unique to historical and contemporary samples for major taxonomic groups (i.e., Amphipoda, Bivalvia, Gastropoda, Polychaeta, other).

| <b>Community</b>      | <b>Species/Taxa</b>              | <b>Major Group</b> | <b>Total abundance</b> |
|-----------------------|----------------------------------|--------------------|------------------------|
| Historical            | <i>Ampharetidae</i> sp.          | Polychaeta         | 38                     |
|                       | <i>Amharete finmarchica</i>      | Polychaeta         | 10                     |
|                       | <i>Dysponetus pygmaeus</i>       | Polychaeta         | 30                     |
|                       | <i>Maldane glebifex</i>          | Polychaeta         | 63                     |
|                       | <i>Dipolydora caulleryi</i>      | Polychaeta         | 20                     |
|                       | <i>Syllides</i> sp.              | Polychaeta         | 90                     |
|                       | <i>Terebellida</i> sp. B         | Polychaeta         | 35                     |
|                       | <i>Artacama proboscidea</i>      | Polychaeta         | 73                     |
|                       | <i>Yoldia</i> sp.                | Bivalvia           | 100                    |
|                       | <i>Turridae</i> sp.              | Gastropoda         | 45                     |
|                       | <i>Protomedeia</i> sp.           | Amphipoda          | 30                     |
|                       | <i>Melita</i> sp.                | Amphipoda          | 18                     |
|                       | <i>Quasimelita formosa</i>       | Amphipoda          | 13                     |
| <i>Bathymedon</i> sp. | Amphipoda                        | 58                 |                        |
| Contemporary          | <i>Axinopsida orbiculate</i>     | Bivalvia           | 71                     |
|                       | <i>Curtitoma incisula</i>        | Gastropoda         | 39                     |
|                       | <i>Dipolydora socialis</i>       | Polychaeta         | 12                     |
|                       | <i>Eteone flava</i>              | Polychaeta         | 37                     |
|                       | <i>Megamoera dentata</i>         | Amphipoda          | 10                     |
|                       | <i>Megayoldia thraciaeformis</i> | Bivalvia           | 59                     |
|                       | <i>Orchomenella minute</i>       | Amphipoda          | 27                     |
|                       | <i>Paratryphosites abyssi</i>    | Amphipoda          | 201                    |
|                       | <i>Priapulul caudatus</i>        | other              | 11                     |
|                       | <i>Propebela rugulata</i>        | Gastropoda         | 23                     |
|                       | <i>Trachyrhynchus erosus</i>     | Gastropoda         | 44                     |

**Table S4.** Results of SIMPER analyses showing trait modalities contributing to ~50% of the dissimilarity between historical and contemporary communities for Placentia Bay, Newfoundland ordered from highest to lowest contribution. The cumulative percent of total expressed traits for influential modalities are also shown.

| <b>Modality (trait)</b>             | <b>Dissimilarity (%)</b> | <b>Cumulative (%)</b> |
|-------------------------------------|--------------------------|-----------------------|
| High (tolerance)                    | 5.9                      | 5.9                   |
| Small (body size)                   | 5.7                      | 11.6                  |
| Subsurface deposit (feeding mode)   | 5.6                      | 17.2                  |
| Benthic/direct (larval development) | 5.4                      | 22.6                  |
| Surface deposit (bioturbator)       | 4.9                      | 27.5                  |
| Sexual external (reproduction)      | 4.7                      | 32.2                  |
| Burrower (adult movement)           | 4.7                      | 36.9                  |
| Burrowing (living habitat)          | 2.6                      | 39.5                  |
| Crawler (adult movement)            | 2.6                      | 42.1                  |
| Medium (body size)                  | 2.6                      | 44.7                  |
| Medium-large (body-size)            | 2.5                      | 47.2                  |

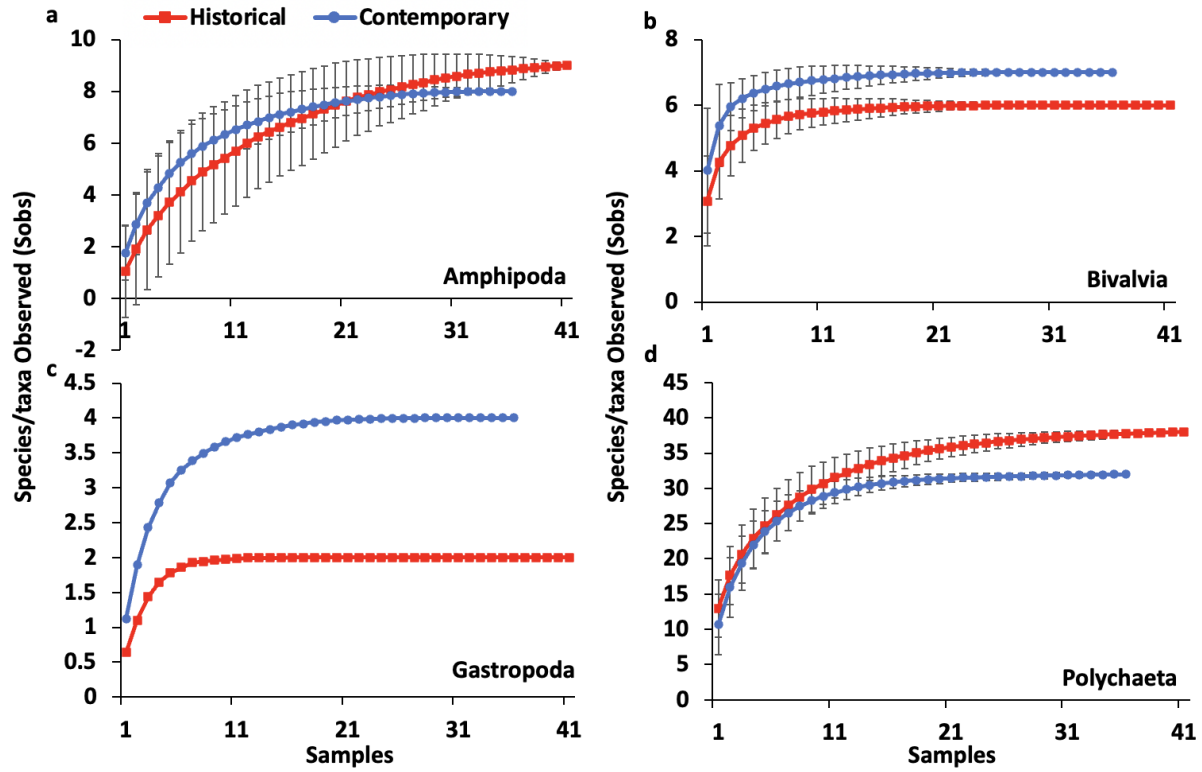

**Fig. S1.** Species accumulation curve based on species/taxa observations  $\pm$ SD for major groups including (a) Amphipoda, (b) Bivalvia, (c) Gastropoda, and (d) Polychaeta for historical and contemporary samples.



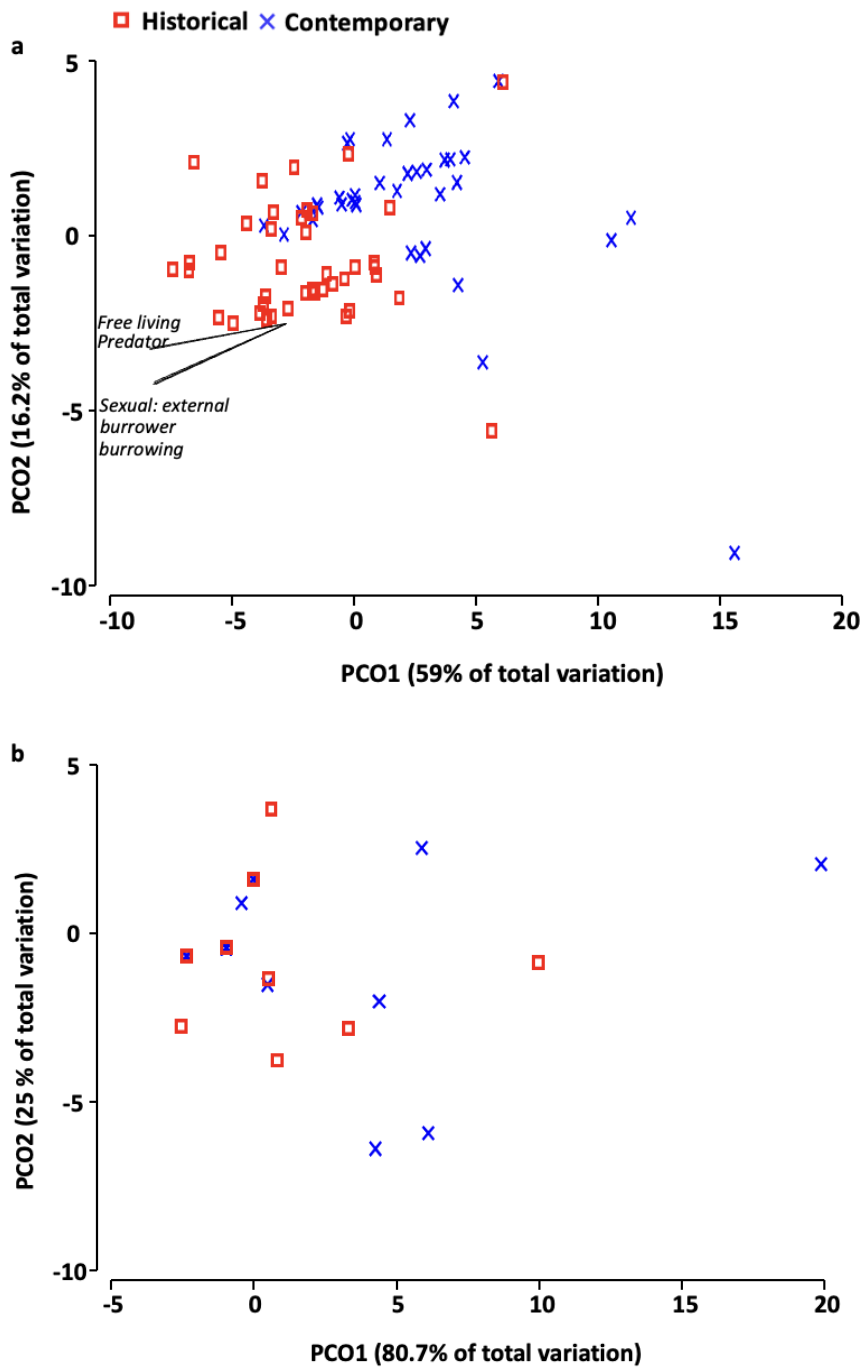

**Fig. S2.** Principal Coordinates Ordination (PCO) of functional traits for (a) expression of modalities based on Canberra similarity, and (b) presence/absence of modalities based on Sorensen resemblance. Differences between the historical versus contemporary communities were statistically significant (pseudo- $F_{1, 75} = 19.5$  and PERMANOVA  $P = 0.0001$ ). Modality vectors = Pearson correlation of  $\geq 0.7$ .

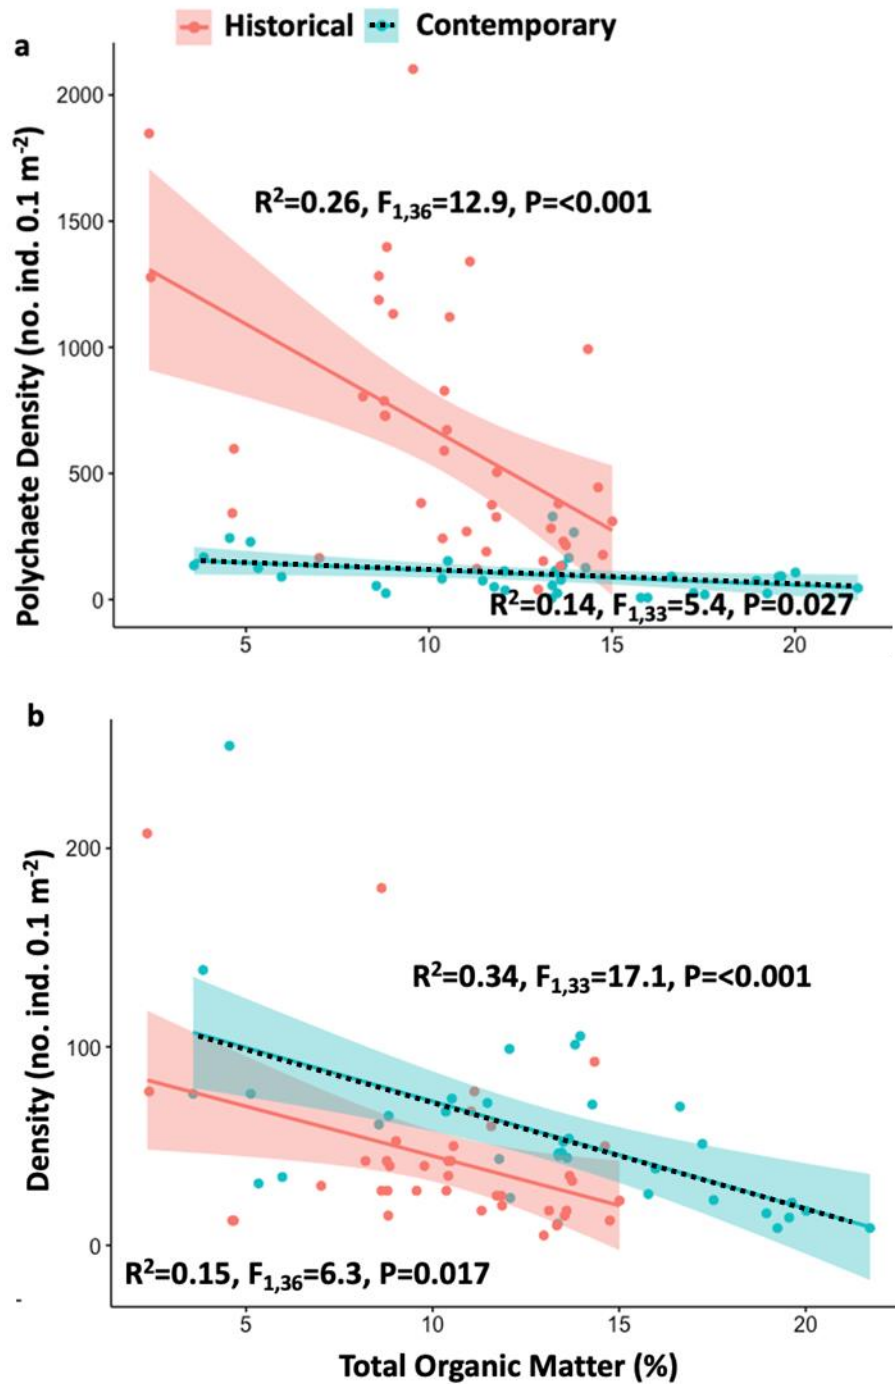

**Fig. S3.** Linear regression of density against total organic matter for (a) polychaetes (no. individuals 0.1m<sup>-2</sup>) and (b) major taxonomic groups excluding polychaetes (i.e., Amphipoda, Gastropoda, and Bivalvia combined). Historical=solid line and contemporary=dotted line.
